# Supplementary material
Source: publisher site journal article supplement (https://www.degruyterbrill.com/publication/isbn/9783110297911/downloadAsset/9783110297911_Inhaltsverzeichnis.pdf)
Supplement: Supplementary file 1 [file 9783110297911_Inhaltsverzeichnis.pdf]

# Inhalt

## *Teil I: Die Dichterin*

|     |                                                                 |    |
|-----|-----------------------------------------------------------------|----|
| 1   | Eine deutsch-jüdische Dichterin .....                           | 3  |
| 1.1 | Im Blickfang .....                                              | 3  |
| 1.2 | Lektüren und Entfaltungen. Einige Anmerkungen zur Forschung ... | 10 |
| 1.3 | Deutsch-jüdisch. Zwischen Differenz und Nicht-Differenz .....   | 31 |
| 1.4 | Die Andere: Fremdzuschreibungen und Selbstzuschreibungen .....  | 41 |
| 2   | Blickpunkt Sommer 1937 .....                                    | 59 |
| 2.1 | Familienbild .....                                              | 59 |
| 2.2 | In einem »Bereich des Mythos«: Der Mann K. J. ....              | 66 |
| 2.3 | <i>So fern den Andern</i> ... Im Jüdischen Kulturbund .....     | 75 |

## *Teil II: Das Gedicht*

|       |                                                               |     |
|-------|---------------------------------------------------------------|-----|
| 3     | <i>Flaschenpost</i> : Ein Gedicht hält auf uns zu .....       | 85  |
| 4     | In der Spur des Anderen: Das Gedicht »Garten im Sommer« ..... | 93  |
| 4.1   | Die erste Strophe: Tanz und Traum .....                       | 100 |
| 4.1.1 | EXKURS: Schriftspuren. Ein uraltes Lied .....                 | 116 |
| 4.2   | Die zweite Strophe: Mortifikationen .....                     | 128 |
| 4.3   | Die dritte Strophe: Welt versunken .....                      | 137 |
| 4.4   | Die vierte Strophe: Tauchen zum Grund .....                   | 152 |
| 4.4.1 | EXKURS: Schriftspuren. Ein Vaternext .....                    | 164 |
| 4.4.2 | Von oben ein Göttliches. Fabel oder Mythos? .....             | 172 |
| 5     | Epilog: Schwanengesang einer Dichterin .....                  | 189 |
| 6     | Ausblick: Spur eines Sagens .....                             | 195 |
| 7     | Danksagung .....                                              | 201 |
| 8     | Literaturverzeichnis .....                                    | 203 |
| 9     | Personenregister .....                                        | 217 |
